# Supplementary material for: Network Design and Allocation Mechanisms for Carrier Alliances in Liner Shipping
Source: Atypon-hosted journal article supplement (doi:10.1287/opre.1100.0848), 2010-12-01
Supplement: opre.1100.0848-sm-ec.pdf [file opre.1100.0848-sm-ec.pdf]

**e - c o m p a n i o n**

ONLY AVAILABLE IN ELECTRONIC FORM

Electronic Companion—“Network Design and Allocation Mechanisms for Carrier Alliances in Liner Shipping” by Richa Agarwal and Özlem Ergun, *Operations Research*, DOI 10.1287/opre.1100.0848.

---

### Online Supplement: An Example with Empty Core

Consider a network with three ports (at the vertices of an equilateral triangle) as represented in Figure 1 and three carriers  $A$ ,  $B$  and  $C$  with fleet size and demand data as represented in Table 1. Let all ships be identical with capacity 100 TEU and the operational costs be negligible. Furthermore, assume that a ship takes one week to go from one port to another.

**Figure 1** An example with empty core.

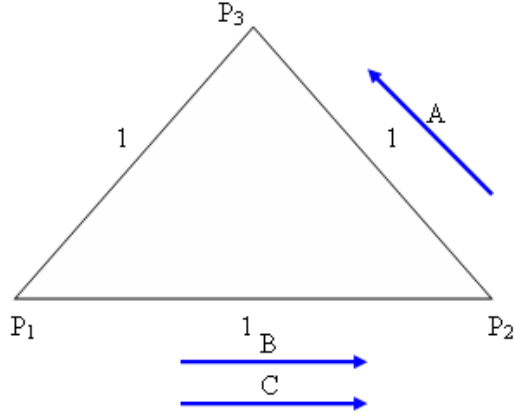

**Table 1** An example with empty core.

| Carrier | # Ships | Demand Information |       |         |         |
|---------|---------|--------------------|-------|---------|---------|
|         |         | From               | To    | Demand  | Revenue |
| A       | 2       | $P_2$              | $P_3$ | 100 TEU | \$1     |
| B       | 1       | $P_1$              | $P_2$ | 100 TEU | \$1     |
| C       | 1       | $P_1$              | $P_2$ | 100 TEU | \$1     |

The maximum revenue generated by the set  $\{A, B, C\}$  is obtained by operating the service route  $P_1 - P_2 - P_3 - P_1$  and satisfying 100 TEUs of demand from  $P_2$  to  $P_3$  and 100 TEUs of demand from  $P_1$  to  $P_2$  with  $opt(\{A, B, C\}) = \$200$ . Note that the same revenue is obtained by operating on service routes  $P_2 - P_3 - P_2$  and  $P_1 - P_2 - P_1$ . Similarly, it is easy to see that:

$$opt(\{A\}) = \$100, \quad opt(\{B\}) = opt(\{C\}) = \$0,$$

$$opt(\{A, B\}) = opt(\{A, C\}) = \$200, \quad opt(\{B, C\}) = \$100.$$

For an allocation  $(x^A, x^B, x^C)$  to be in the core we must have that the sum of the payoffs over all carriers be their maximum attainable revenue i.e.

$$x^A + x^B + x^C = 200.$$

However, the sum of two carrier rationality constraints requires

$$x^A + x^B + x^C \geq 250.$$

Thus the core of this game is empty.
